# Supplementary material for: US public investment in development of mRNA covid-19 vaccines: retrospective cohort study
Source: PubMed Central journal article supplement — BMJ. 2023 Mar 1;380:e073747. doi: 10.1136/bmj-2022-073747 (PMC9975718; doi:10.1136/bmj-2022-073747), 2023-03-01
Supplement: lalh073747.ww1.pdf [file lalh073747.ww1.pdf]

## Supplemental Online Content

**eTable 1.** Patents Associated with mRNA COVID-19 Vaccines.

**eTable 2.** Scientists Associated with mRNA COVID-19 Vaccine Development.

**eTable 3.** National Institute of Health Grants Directly Related to mRNA Covid-19 Vaccines

**eTable 4.** Biomedical Advanced Research and Development Authority and Department of Defense Grants Directly Related to mRNA COVID-19 Development.

eTable 1. Patents Associated with mRNA COVID-19 Vaccines.

| Year | Patent Number   | Title                                                                                                                                                                       |
|------|-----------------|-----------------------------------------------------------------------------------------------------------------------------------------------------------------------------|
| 2003 | US7901708B2     | Liposomal apparatus and manufacturing methods                                                                                                                               |
| 2004 | US7803397B2     | Polyethyleneglycol-modified lipid compounds and uses thereof                                                                                                                |
| 2005 | US7745651B2     | Cationic lipids and methods of use                                                                                                                                          |
| 2005 | US7799565B2     | Lipid encapsulated interfering RNA                                                                                                                                          |
| 2006 | US7982027B2     | Lipid encapsulated interfering RNA                                                                                                                                          |
| 2006 | US9005654B2     | Systems and methods for manufacturing liposomes                                                                                                                             |
| 2006 | US8278036B2     | RNA containing modified nucleosides and methods of use thereof                                                                                                              |
| 2006 | US7838658B2     | siRNA silencing of filovirus gene expression                                                                                                                                |
| 2006 | US8101741B2     | Modified siRNA molecules and uses thereof                                                                                                                                   |
| 2007 | US7915399B2     | Modified siRNA molecules and uses thereof                                                                                                                                   |
| 2008 | WO2009086558A1  | Improved compositions and methods for the delivery of nucleic acids                                                                                                         |
| 2009 | US8188263B2     | Modified siRNA molecules and uses thereof                                                                                                                                   |
| 2009 | US8058069B2     | Lipid formulations for nucleic acid delivery                                                                                                                                |
| 2009 | US9139554B2     | Amino lipids and methods for the delivery of nucleic acids                                                                                                                  |
| 2010 | US8283333B2     | Lipid formulations for nucleic acid delivery                                                                                                                                |
| 2010 | US8936942B2     | Polyethyleneglycol-modified lipid compounds and uses thereof                                                                                                                |
| 2010 | WO2011036557A1  | Compositions and methods for enhancing cellular uptake and intracellular delivery of lipid particles                                                                        |
| 2010 | US9012219B2     | RNA preparations comprising purified modified RNA for reprogramming cells                                                                                                   |
| 2010 | US8329070B2     | Liposomal apparatus and manufacturing method                                                                                                                                |
| 2011 | US9006417B2     | Non-liposomal systems for nucleic acid delivery                                                                                                                             |
| 2011 | US8492359B2     | Lipid formulations for nucleic acid delivery                                                                                                                                |
| 2011 | US20140030808A1 | Method for cellular RNA expression                                                                                                                                          |
| 2011 | WO2013087083A1  | Particles comprising single stranded RNA and double stranded RNA for immunomodulation                                                                                       |
| 2012 | US9758795B2     | Nucleic acid-containing lipid particles and related methods                                                                                                                 |
| 2012 | US8691966B2     | RNA containing modified nucleosides and methods of use thereof                                                                                                              |
| 2012 | WO2013059922A1  | Limit size lipid nanoparticles and related methods                                                                                                                          |
| 2013 | US9669089B2     | Nucleic acid comprising or coding for a histone stem-loop and a poly(A) sequence or a polyadenylation signal for increasing the expression of an encoded pathogenic antigen |
| 2013 | US8835108B2     | RNA containing modified nucleosides and methods of use thereof                                                                                                              |
| 2013 | US8748089B2     | RNA containing modified nucleosides and methods of use thereof                                                                                                              |
| 2013 | US8822668B2     | Lipid formulations for nucleic acid delivery                                                                                                                                |
| 2013 | US9074208B2     | Modified siRNA molecules and uses thereof                                                                                                                                   |
| 2013 | US9950065B2     | Particles comprising a shell with RNA                                                                                                                                       |
| 2013 | WO2015043613A1  | Particles comprising a shell with RNA                                                                                                                                       |
| 2013 | US9814777B2     | Targeting lipids                                                                                                                                                            |
| 2014 | US9504651B2     | Lipid compositions for nucleic acid delivery                                                                                                                                |
| 2014 | US20150017211A1 | Delivery and formulation of engineered nucleic acids                                                                                                                        |
| 2014 | US9750824B2     | RNA containing modified nucleosides and methods of use thereof                                                                                                              |
| 2014 | US9364435B2     | Lipid formulations for nucleic acid delivery                                                                                                                                |
| 2014 | US9694077B2     | Lipid compositions                                                                                                                                                          |

|      |                 |                                                                                                                            |
|------|-----------------|----------------------------------------------------------------------------------------------------------------------------|
| 2014 | US10159652B2    | Device for formulating particles at small volumes                                                                          |
| 2015 | US9404127B2     | Non-liposomal systems for nucleic acid delivery                                                                            |
| 2015 | US20150184123A1 | RNA preparations comprising purified modified RNA for reprogramming cells                                                  |
| 2015 | US9163213B2     | RNA preparations comprising purified modified RNA for reprogramming cells                                                  |
| 2015 | WO2015164674A1  | Nucleic acid vaccines                                                                                                      |
| 2015 | US9567296B2     | Ionizable cationic lipid for RNA delivery                                                                                  |
| 2015 | US9371511B2     | RNA preparations comprising purified modified RNA for reprogramming cells                                                  |
| 2015 | US10653780B2    | Amino lipids and methods for the delivery of nucleic acids                                                                 |
| 2015 | US20170273907A1 | Stable formulations of lipids and liposomes                                                                                |
| 2016 | US10385106B2    | Modified polynucleotides for the production of secreted proteins                                                           |
| 2016 | WO2016118724A1  | Lipid nanoparticle compositions                                                                                            |
| 2016 | WO2016118725A1  | Lipid nanoparticle compositions                                                                                            |
| 2016 | US20180263907A1 | Lipid particle formulations for delivery of RNA and water-soluble therapeutically effective compounds to a target cell     |
| 2016 | WO2016156398A1  | Lipid particle formulations for delivery of RNA and water-soluble therapeutically effective compounds to a target cell     |
| 2016 | US9943846B2     | Limit size lipid nanoparticles and related methods                                                                         |
| 2016 | US10780054B2    | Lyophilization of RNA                                                                                                      |
| 2016 | US20180303925A1 | Nucleoside-modified RNA for inducing an adaptive immune response                                                           |
| 2016 | US9580711B2     | Lipid particles with asymmetric cationic lipids for RNA delivery                                                           |
| 2016 | US9518272B2     | Non-liposomal systems for nucleic acid delivery                                                                            |
| 2016 | US10006007B2    | RNA preparations comprising purified modified RNA for reprogramming cells                                                  |
| 2016 | US20180296663A1 | Vaccine composition                                                                                                        |
| 2016 | US10221127B2    | Lipids and lipid nanoparticle formulations for delivery of nucleic acids                                                   |
| 2016 | US20200085852A1 | Epidermal mRNA vaccine                                                                                                     |
| 2016 | US20190153428A1 | Method for reducing immunogenicity of RNA                                                                                  |
| 2016 | US20190153425A1 | Methods for providing single-stranded RNA                                                                                  |
| 2016 | US20190010485A1 | Method of RNA in vitro transcription using a buffer containing a dicarboxylic acid or tricarboxylic acid or a salt thereof |
| 2016 | US10166298B2    | Lipids and lipid nanoparticle formulations for delivery of nucleic acids                                                   |
| 2016 | US10232055B2    | RNA containing modified nucleosides and methods of use thereof                                                             |
| 2016 | US20190083602A1 | Method for producing RNA molecule compositions                                                                             |
| 2016 | US20190022247A1 | Lipids and lipid nanoparticle formulations for delivery of nucleic acids                                                   |
| 2017 | US9868692B2     | Compounds and compositions for intracellular delivery of therapeutic agents                                                |
| 2017 | US20170210697A1 | Compounds and compositions for intracellular delivery of therapeutic agents                                                |
| 2017 | US20200046838A1 | Lipids for delivery of active agents                                                                                       |
| 2017 | US20170239374A1 | Modified nucleosides, nucleotides, and nucleic acids, and uses thereof                                                     |
| 2017 | US10064959B2    | Modified nucleosides, nucleotides, and nucleic acids, and uses thereof                                                     |
| 2017 | US20190336608A1 | Cationic carriers for nucleic acid delivery                                                                                |
| 2017 | US20200179526A1 | Hybrid carriers for nucleic acid cargo                                                                                     |
| 2017 | US10106490B2    | Lipids and lipid nanoparticle formulations for delivery of nucleic acids                                                   |
| 2017 | US20190321458A1 | Formulation for administration of RNA                                                                                      |
| 2017 | US10041091B2    | Nucleic acid-containing lipid particles and related methods                                                                |

|      |                 |                                                                                                                                                                             |
|------|-----------------|-----------------------------------------------------------------------------------------------------------------------------------------------------------------------------|
| 2017 | US20200061185A1 | Prefusion coronavirus spike proteins and their use                                                                                                                          |
| 2017 | US10960070B2    | Prefusion coronavirus spike proteins and their use                                                                                                                          |
| 2017 | US20200163878A1 | Lipid nanoparticle mRNA vaccines                                                                                                                                            |
| 2017 | US20190274968A1 | Nucleoside-modified RNA for inducing an adaptive immune response                                                                                                            |
| 2017 | US10233148B2    | Aromatic ionizable cationic lipid                                                                                                                                           |
| 2017 | US10815463B2    | Messenger UNA molecules and uses thereof                                                                                                                                    |
| 2017 | US20180185516A1 | Delivery of target specific nucleases                                                                                                                                       |
| 2017 | US10442756B2    | Compounds and compositions for intracellular delivery of therapeutic agents                                                                                                 |
| 2017 | US20190351048A1 | Mers coronavirus vaccine                                                                                                                                                    |
| 2018 | US10227302B2    | Ionizable cationic lipid for RNA delivery                                                                                                                                   |
| 2018 | US10576146B2    | Particles comprising a shell with RNA                                                                                                                                       |
| 2018 | US20200197508A1 | Methods and compositions for stimulating immune response                                                                                                                    |
| 2018 | US20200046830A1 | Nucleic acid vaccine composition comprising a lipid formulation, and method of increasing the potency of nucleic acid vaccines                                              |
| 2018 | US20190002906A1 | Synthesis and structure of high potency RNA therapeutics                                                                                                                    |
| 2018 | US10266485B2    | Compounds and compositions for intracellular delivery of therapeutic agents                                                                                                 |
| 2018 | US20190032087A1 | Nucleic acid-containing lipid particles and related methods                                                                                                                 |
| 2018 | US20200172472A1 | Lipids for use in lipid nanoparticle formulations                                                                                                                           |
| 2018 | US20190015501A1 | Nucleic acid vaccines                                                                                                                                                       |
| 2019 | US10799602B2    | Method for increasing expression of RNA-encoded proteins                                                                                                                    |
| 2019 | US20210137840A1 | Lipid-based formulations for the delivery of RNA                                                                                                                            |
| 2019 | US10703789B2    | Modified polynucleotides for the production of secreted proteins                                                                                                            |
| 2019 | US10577403B2    | Modified polynucleotides for the production of secreted proteins                                                                                                            |
| 2019 | US20190314496A1 | Polymeric carrier cargo complex for use as an immunostimulating agent or as an adjuvant                                                                                     |
| 2019 | WO2020002598A1  | Bioreactor for RNA in vitro transcription                                                                                                                                   |
| 2019 | US20200164038A1 | Modified nucleoside, nucleotide, and nucleic acid compositions                                                                                                              |
| 2019 | US20190388562A1 | Ionizable cationic lipid for RNA delivery                                                                                                                                   |
| 2019 | US20200206362A1 | Compositions and methods for delivery of agents                                                                                                                             |
| 2019 | WO2020097540A1  | Lipid nanoparticle formulations                                                                                                                                             |
| 2019 | WO2020097548A1  | Lipid nanoparticle formulations                                                                                                                                             |
| 2019 | US20200109113A1 | Ionizable cationic lipid for RNA delivery                                                                                                                                   |
| 2020 | US20200283372A1 | Lipids for lipid nanoparticle delivery of active agents                                                                                                                     |
| 2020 | US20200155671A1 | Particles comprising a shell with RNA                                                                                                                                       |
| 2020 | US10702600B1    | Betacoronavirus mRNA vaccine                                                                                                                                                |
| 2020 | US20200297634A1 | Method of making lipid-encapsulated RNA nanoparticles                                                                                                                       |
| 2020 | US20200246451A1 | Method for producing RNA compositions                                                                                                                                       |
| 2020 | US20200282046A1 | Betacoronavirus MRNA vaccine                                                                                                                                                |
| 2020 | US20200345831A1 | Nucleic acid comprising or coding for a histone stem-loop and a poly(a) sequence or a polyadenylation signal for increasing the expression of an encoded pathogenic antigen |
| 2020 | US20200399629A1 | Method for reducing immunogenicity of RNA                                                                                                                                   |
| 2021 | US20210275664A1 | Prefusion coronavirus spike proteins and their use                                                                                                                          |
| 2021 | US10485884B2    | RNA formulation for immunotherapy                                                                                                                                           |
| 2021 | US20210292786A1 | Purification and purity assessment of RNA molecules synthesized with modified nucleosides                                                                                   |
| 2021 | US20210340170A1 | 5'-cap compounds and their uses in stabilizing RNA, expressing proteins and in therapy                                                                                      |

eTable 2. Scientists Associated with mRNA COVID-19 Vaccine Development.

| <b>Inventor or Scientist</b> | <b>Associated Innovations</b>                                               | <b>Method of Identification</b>                |
|------------------------------|-----------------------------------------------------------------------------|------------------------------------------------|
| Adam Judge                   | lipid nanoparticle, mRNA synthesis or modification                          | Patent review                                  |
| Alan Martin                  | lipid nanoparticle                                                          | Patent review                                  |
| Aleksandra Kowalczyk         | mRNA vaccine technology                                                     | Patent review                                  |
| Alex Leung                   | lipid nanoparticle                                                          | Patent review                                  |
| Alexander Bukreyev           | lipid nanoparticle, mRNA synthesis or modification, mRNA vaccine technology | News reports                                   |
| Amy Lee                      | mRNA synthesis or modification                                              | Patent review                                  |
| Andre Wild                   | lipid nanoparticle                                                          | Patent review                                  |
| Andreas Funkner              | mRNA synthesis or modification                                              | Patent review                                  |
| Andreas Kuhn                 | mRNA synthesis or modification                                              | Patent review                                  |
| Andreas Thess                | mRNA synthesis or modification                                              | Patent review                                  |
| Andrew Geall                 | lipid nanoparticle                                                          | Literature review                              |
| Andrew Ward                  | prefusion spike protein                                                     | Patent review, Literature review, News reports |
| Angel I-Jou Leu              | mRNA synthesis or modification                                              | Patent review                                  |
| Aniela Wochner               | mRNA synthesis or modification                                              | Patent review                                  |
| Anna Blakney                 | mRNA synthesis or modification                                              | Literature review                              |
| Anne Schlegel                | mRNA synthesis or modification                                              | Patent review                                  |
| Annette Vogel                | mRNA synthesis or modification                                              | Patent review                                  |
| Anthony Conway               | lipid nanoparticle                                                          | Patent review                                  |
| Anthony Person               | mRNA synthesis or modification                                              | Patent review                                  |
| Antonin de Fougères          | lipid nanoparticle, mRNA synthesis or modification                          | Patent review                                  |
| Arisa Cale                   | mRNA synthesis or modification                                              | Patent review                                  |
| Axel Bouchon                 | mRNA vaccine technology                                                     | Patent review                                  |
| Aysha Ansari                 | lipid nanoparticle                                                          | Patent review                                  |
| Barbara Low Shoud Mui        | lipid nanoparticle, mRNA synthesis or modification                          | Patent review                                  |
| Barney Graham                | prefusion spike protein                                                     | Patent review, Literature review, News reports |
| Benjamin Petsch              | lipid nanoparticle                                                          | Patent review                                  |
| Benyamin Yazdan Panah        | mRNA synthesis or modification                                              | Patent review                                  |
| Bo Ying                      | mRNA synthesis or modification                                              | Literature review                              |
| Carl Hansen                  | lipid nanoparticle                                                          | Patent review                                  |
| Carlos G. Perez-Garcia       | mRNA synthesis or modification                                              | Patent review                                  |
| Carolin Thiele               | lipid nanoparticle                                                          | Patent review                                  |
| Christian Dohmen             | lipid nanoparticle                                                          | Patent review                                  |
| Christopher Barbosa          | lipid nanoparticle                                                          | Patent review                                  |
| Christopher Cottrell         | prefusion spike protein                                                     | Patent review                                  |
| Ciaran Lawlor                | lipid nanoparticle                                                          | Patent review                                  |
| Colin Walsh                  | lipid nanoparticle                                                          | Patent review                                  |

|                                      |                                                    |                                                |
|--------------------------------------|----------------------------------------------------|------------------------------------------------|
| Cory Giesbrecht                      | lipid nanoparticle, mRNA synthesis or modification | Patent review                                  |
| Daniel Fritz                         | mRNA synthesis or modification                     | Patent review                                  |
| Daniel Wrapp                         | prefusion spike protein                            | Patent review, News reports                    |
| Daniel Zucker                        | mRNA synthesis or modification                     | Patent review                                  |
| David Butler                         | lipid nanoparticle                                 | Patent review                                  |
| David Curiel                         | mRNA synthesis or modification                     | Literature review                              |
| David Walker                         | lipid nanoparticle                                 | Patent review                                  |
| David Webb                           | lipid nanoparticle                                 | Patent review                                  |
| Derrick Rossi                        | mRNA synthesis or modification                     | Patent review, Literature review, News reports |
| Douglas Melton                       | mRNA synthesis or modification                     | Literature review                              |
| Drew Weissman                        | mRNA synthesis or modification                     | Patent review, Literature review, News reports |
| Edith Jasny                          | lipid nanoparticle                                 | Patent review                                  |
| Edward Yaworski                      | lipid nanoparticle                                 | Patent review                                  |
| Eli Gilboa                           | mRNA synthesis or modification                     | Literature review                              |
| Ellalahewage Sathyajith Kumarasinghe | lipid nanoparticle                                 | Patent review                                  |
| Ellen Frace Ambegia                  | lipid nanoparticle, mRNA synthesis or modification | Patent review                                  |
| Elliot Kagan                         | mRNA synthesis or modification                     | Patent review                                  |
| Eric Mucker                          | lipid nanoparticle                                 | Patent review                                  |
| Eric Yi-Chun Huang                   | mRNA vaccine technology                            | Patent review                                  |
| Esparza Borquez                      | lipid nanoparticle                                 | Patent review                                  |
| Euan Ramsay                          | lipid nanoparticle                                 | Patent review                                  |
| Fabian Johannes Eber                 | mRNA synthesis or modification                     | Patent review                                  |
| Felix Bertsch                        | mRNA synthesis or modification                     | Patent review                                  |
| Florian Von Der Mulbe                | mRNA vaccine technology                            | Patent review                                  |
| Frank Schaubhut                      | mRNA vaccine technology                            | Patent review                                  |
| Gary Dahl                            | mRNA synthesis or modification                     | Patent review                                  |
| Gary Lee                             | lipid nanoparticle                                 | Patent review                                  |
| Gilles Besin                         | lipid nanoparticle                                 | Patent review                                  |
| Giuseppe Ciaramella                  | mRNA vaccine technology                            | Patent review                                  |
| Hadi Yassine                         | prefusion spike protein                            | Patent review                                  |
| Hannah Turner                        | prefusion spike protein                            | Patent review                                  |
| Heinrich Haas                        | lipid nanoparticle, mRNA synthesis or modification | Patent review                                  |
| Hiroshi Muramatsu                    | mRNA synthesis or modification                     | Patent review                                  |
| Hossam Hefesha                       | lipid nanoparticle, mRNA synthesis or modification | Patent review                                  |
| Ian MacLachlan                       | lipid nanoparticle, mRNA synthesis or modification | Patent review, Literature review               |
| Igor Jigaltsev                       | lipid nanoparticle                                 | Patent review                                  |
| Inder Verma                          | lipid nanoparticle                                 | Literature review                              |
| Ingmar Hoerr                         | mRNA synthesis or modification                     | Literature review                              |
| Isaac Heman                          | lipid nanoparticle                                 | Patent review                                  |

|                         |                                                    |                                                |
|-------------------------|----------------------------------------------------|------------------------------------------------|
| Ismail Hafez            | lipid nanoparticle                                 | Patent review                                  |
| James Heyes             | lipid nanoparticle, mRNA synthesis or modification | Patent review                                  |
| Jared Davis             | mRNA synthesis or modification                     | Patent review                                  |
| Jason McLellan          | prefusion spike protein                            | Patent review, Literature review, News reports |
| Jason Schrum            | mRNA synthesis or modification                     | Patent review                                  |
| Jay Hooper              | lipid nanoparticle                                 | Patent review                                  |
| Jayaprakash Nair        | lipid nanoparticle                                 | Patent review                                  |
| Jeffrey Ulmer           | lipid nanoparticle                                 | Literature review                              |
| Jens Huft               | lipid nanoparticle                                 | Patent review                                  |
| Jerome Jendrisak        | mRNA synthesis or modification                     | Patent review                                  |
| Jesper Pallesen         | prefusion spike protein                            | Patent review                                  |
| Jianxin Chen            | lipid nanoparticle, mRNA synthesis or modification | Patent review                                  |
| Jochen Probst           | mRNA synthesis or modification                     | Patent review                                  |
| Johannes Lutz           | lipid nanoparticle, mRNA vaccine technology        | Patent review                                  |
| John Mascola            | prefusion spike protein                            | Patent review, News reports                    |
| Jorge Moreno Herrero    | mRNA synthesis or modification                     | Patent review                                  |
| Joseph Payne            | lipid nanoparticle, mRNA synthesis or modification | Patent review                                  |
| Joseph Senn             | lipid nanoparticle                                 | Patent review                                  |
| Judith Meis             | mRNA synthesis or modification                     | Patent review                                  |
| Justin Guild            | mRNA synthesis or modification                     | Patent review                                  |
| Kallanthottathil Rajeev | lipid nanoparticle, mRNA synthesis or modification | Patent review                                  |
| Katalin Kariko          | mRNA synthesis or modification                     | Patent review, Literature review, News reports |
| Katharina Kolland       | mRNA synthesis or modification                     | Patent review                                  |
| Kenechi Ejebe           | mRNA synthesis or modification                     | Patent review                                  |
| Kerry Benenato          | lipid nanoparticle                                 | Patent review                                  |
| Kerstin Reuter          | lipid nanoparticle, mRNA synthesis or modification | Patent review                                  |
| Kevin Ou                | lipid nanoparticle                                 | Patent review                                  |
| Kieu Lam                | lipid nanoparticle                                 | Patent review                                  |
| Kim Ellen Schwendt      | lipid nanoparticle                                 | Patent review                                  |
| Kim Wong                | lipid nanoparticle, mRNA synthesis or modification | Patent review                                  |
| Kiyoshi Tachikawa       | mRNA synthesis or modification                     | Patent review                                  |
| Kizzmekia Corbett       | prefusion spike protein                            | Patent review, News reports                    |
| Kristy Wood             | mRNA synthesis or modification                     | Patent review                                  |
| Larry Lawrence Corey    | mRNA vaccine technology                            | Patent review, News reports                    |
| Lena Mareen Kranz       | mRNA synthesis or modification                     | Patent review                                  |
| Lisa Hensley            | mRNA synthesis or modification                     | Patent review                                  |
| Lloyd Jeffs             | lipid nanoparticle, mRNA synthesis or modification | Patent review                                  |
| Lorne Palmer            | lipid nanoparticle, mRNA synthesis or modification | Patent review                                  |
| Luigi Warren            | mRNA synthesis or modification                     | Patent review                                  |

|                       |                                                                             |                             |
|-----------------------|-----------------------------------------------------------------------------|-----------------------------|
| Madeleine Hipp        | mRNA vaccine technology                                                     | Patent review               |
| Mahjoub Bihi          | mRNA synthesis or modification                                              | Patent review               |
| Marco Ciufolini       | lipid nanoparticle, mRNA synthesis or modification                          | Patent review               |
| Marco Poleganov       | mRNA synthesis or modification                                              | Patent review               |
| Mariola Fotin-Mleczek | lipid nanoparticle, mRNA synthesis or modification, mRNA vaccine technology | Patent review               |
| Mark Cornebise        | lipid nanoparticle                                                          | Patent review               |
| Markus Baiersdorfer   | mRNA synthesis or modification                                              | Patent review               |
| Markus Conzelmann     | mRNA synthesis or modification                                              | Patent review               |
| Markus Kreuz          | mRNA synthesis or modification                                              | Patent review               |
| Martin Kunze          | mRNA synthesis or modification                                              | Patent review               |
| Martin Meng           | mRNA synthesis or modification                                              | Patent review               |
| Masaru Kanekiyo       | prefusion spike protein                                                     | Patent review               |
| Matthew Winkler       | mRNA synthesis or modification                                              | Literature review           |
| Michael Gordon Joyce  | prefusion spike protein                                                     | Patent review               |
| Michael Green         | mRNA synthesis or modification                                              | Literature review           |
| Michael Heartlein     | mRNA synthesis or modification                                              | Literature review           |
| Michael Holmes        | lipid nanoparticle                                                          | Patent review               |
| Michael Hope          | lipid nanoparticle, mRNA synthesis or modification                          | Patent review               |
| Michael Jung          | lipid nanoparticle                                                          | Patent review               |
| Michael Rauen         | mRNA synthesis or modification                                              | Patent review               |
| Michael Sonntag       | mRNA synthesis or modification                                              | Patent review               |
| Michael Wiggenhorn    | mRNA synthesis or modification, mRNA vaccine technology                     | Patent review               |
| Michel Roberge        | lipid nanoparticle                                                          | Patent review               |
| Mustafa Diken         | lipid nanoparticle, mRNA synthesis or modification                          | Patent review               |
| Muthiah Manoharan     | lipid nanoparticle, mRNA synthesis or modification                          | Patent review               |
| Muthusamy Jayaraman   | lipid nanoparticle                                                          | Patent review               |
| Nathan Belliveau      | lipid nanoparticle                                                          | Patent review               |
| Nianshuang Wang       | prefusion spike protein                                                     | Patent review, News reports |
| Norbert Pardi         | mRNA synthesis or modification                                              | Patent review, News reports |
| Noubar Afeyan         | mRNA synthesis or modification                                              | Patent review, News reports |
| Olga Mykhaliyk        | lipid nanoparticle                                                          | Patent review               |
| Orn Almarsson         | lipid nanoparticle                                                          | Patent review               |
| Ozlem Tureci          | mRNA synthesis or modification                                              | Literature review           |
| Padmanabh Chivukula   | lipid nanoparticle, mRNA synthesis or modification                          | Patent review               |
| Patrick Baumhof       | lipid nanoparticle, mRNA vaccine technology                                 | Patent review               |
| Pattranee Limphong    | mRNA synthesis or modification                                              | Patent review               |
| Paul Krieg            | mRNA synthesis or modification                                              | Literature review           |
| Paulo Jia Ching Lin   | lipid nanoparticle                                                          | Patent review               |
| Pedro Valencia        | mRNA synthesis or modification                                              | Patent review               |
| Peter Kwong           | prefusion spike protein                                                     | Patent review, News reports |



|                     |                                                                             |                                  |
|---------------------|-----------------------------------------------------------------------------|----------------------------------|
| Peter Liljestrom    | mRNA synthesis or modification                                              | Literature review                |
| Petra Schreiner     | lipid nanoparticle                                                          | Patent review                    |
| Philip Felgner      | lipid nanoparticle                                                          | Literature review                |
| Philipp Hoffmann    | mRNA synthesis or modification                                              | Patent review                    |
| Pieter Cullis       | lipid nanoparticle, mRNA synthesis or modification                          | Patent review, Literature review |
| Priya Karmali       | lipid nanoparticle                                                          | Patent review                    |
| Regina Heidenreich  | lipid nanoparticle, mRNA synthesis or modification, mRNA vaccine technology | Patent review                    |
| Robert James Taylor | lipid nanoparticle                                                          | Patent review                    |
| Robert Kirchoerfer  | prefusion spike protein                                                     | Patent review                    |
| Robert Langer       | lipid nanoparticle, mRNA synthesis or modification                          | Patent review, News reports      |
| Robert Malone       | lipid nanoparticle                                                          | Literature review                |
| Salih Yimaz         | mRNA synthesis or modification                                              | Patent review                    |
| Sandra Lazzaro      | lipid nanoparticle                                                          | Patent review                    |
| Sayda Elbashir      | mRNA synthesis or modification                                              | Patent review                    |
| Sean Semple         | lipid nanoparticle, mRNA synthesis or modification                          | Patent review                    |
| Sebastian Horner    | mRNA synthesis or modification                                              | Patent review                    |
| Sebastian Kreiter   | lipid nanoparticle, mRNA synthesis or modification                          | Patent review                    |
| Srinivasulu Masuna  | lipid nanoparticle                                                          | Patent review                    |
| Staci Sabnis        | lipid nanoparticle                                                          | Patent review                    |
| Stefanie Sewing     | mRNA synthesis or modification                                              | Patent review                    |
| Stephanie Erbar     | mRNA synthesis or modification                                              | Patent review                    |
| Stephanie Fesser    | mRNA synthesis or modification                                              | Patent review                    |
| Stephanie Herz      | mRNA synthesis or modification                                              | Patent review                    |
| Stephen Hoge        | lipid nanoparticle                                                          | Patent review                    |
| Stephen Reid        | lipid nanoparticle                                                          | Patent review                    |
| Steve Pascolo       | mRNA synthesis or modification                                              | Patent review, Literature review |
| Steven Ansell       | lipid nanoparticle                                                          | Patent review                    |
| Steven Tanis        | lipid nanoparticle                                                          | Patent review                    |
| Stuart Malcolm      | lipid nanoparticle                                                          | Patent review                    |
| Suhaib Siddiqi      | mRNA synthesis or modification                                              | Patent review                    |
| Sunny Himansu       | mRNA vaccine technology                                                     | Patent review                    |
| Susanne Rauch       | lipid nanoparticle, mRNA synthesis or modification, mRNA vaccine technology | Patent review                    |
| Thomas Geisbert     | mRNA synthesis or modification                                              | Patent review                    |
| Thomas Ketterer     | mRNA vaccine technology                                                     | Patent review                    |
| Thomas Madden       | lipid nanoparticle                                                          | Patent review, Literature review |
| Thomas Schlake      | mRNA synthesis or modification                                              | Patent review                    |
| Thorsten Klamp      | mRNA synthesis or modification                                              | Patent review                    |
| Thorsten Mutzke     | mRNA synthesis or modification, mRNA vaccine technology                     | Patent review                    |
| Tilmann Roos        | mRNA synthesis or modification                                              | Patent review                    |

|                |                                                    |                                                |
|----------------|----------------------------------------------------|------------------------------------------------|
| Tim Beisert    | mRNA synthesis or modification                     | Patent review                                  |
| Timothy Leaver | lipid nanoparticle                                 | Patent review                                  |
| Tom Maniatis   | mRNA synthesis or modification                     | Literature review                              |
| Ugur Sahin     | lipid nanoparticle, mRNA synthesis or modification | Patent review, Literature review, News reports |
| Vandana Sood   | mRNA synthesis or modification                     | Patent review                                  |
| Wenke Wagner   | mRNA synthesis or modification                     | Patent review                                  |
| Xinyao Du      | lipid nanoparticle                                 | Patent review                                  |
| Yanjie Bao     | lipid nanoparticle                                 | Patent review                                  |
| Ying K. Tam    | lipid nanoparticle, mRNA synthesis or modification | Patent review                                  |
| Yuen Yi C. Tam | lipid nanoparticle                                 | Patent review                                  |
| Yves Husemann  | lipid nanoparticle, mRNA synthesis or modification | Patent review                                  |

eTable 3. National Institute of Health Grants Directly Related to mRNA Covid-19 Vaccines.

| NIH-Funded Grant                                                                                                                              | Funding Agency | NIH-Funded Grant at Fiscal Year Level | Principal Investigator or Project Leader | Organization Name                                     | Fiscal Year | Fiscal Cost (2022 USD) |
|-----------------------------------------------------------------------------------------------------------------------------------------------|----------------|---------------------------------------|------------------------------------------|-------------------------------------------------------|-------------|------------------------|
| Epitope-Based Design and Modified RNA Platform for Bivalent Marburgvirus Vaccine                                                              | NIAID          | 5R01AI141661-04                       | BUKREYEV, ALEXANDER                      | UNIVERSITY OF TEXAS MED BR GALVESTON                  | 2022        | 756,658                |
|                                                                                                                                               |                | 5R01AI141661-03                       |                                          |                                                       | 2021        | 815,777                |
|                                                                                                                                               |                | 5R01AI141661-02                       |                                          |                                                       | 2020        | 838,401                |
|                                                                                                                                               |                | 1R01AI141661-01                       |                                          |                                                       | 2019        | 922,478                |
| CoVNP 3005 - Efficacy, Immunogenicity, and Safety of SARS-CoV-2 Recombinant Protein Vaccine with Adjuvant in Adults 18 Years of Age and Older | NIAID          | 3UM1AI068614-15S2                     | COREY, LAWRENCE                          | FRED HUTCHINSON CANCER RESEARCH CENTER                | 2021        | 66,036,292             |
| HVTN 405/HPTN 1901 Characterizing SARS-CoV-2-specific immunity in convalescent individuals                                                    | NIAID          | 3UM1AI068614-14S1                     | COREY, LAWRENCE                          | FRED HUTCHINSON CANCER RESEARCH CENTER                | 2020        | 393,953,859            |
| Investigating the mechanism of mRNA cleavage in the ribosomal A-site                                                                          | NIGMS          | 5F32GM087070-02                       | DAVIS, JARED HENRY                       | YALE UNIVERSITY                                       | 2010        | 65,465                 |
|                                                                                                                                               |                | 1F32GM087070-01                       |                                          |                                                       | 2009        | 62,884                 |
| Advancement of Vaccines and Treatments for Ebola and Marburg Virus Infections                                                                 | NIAID          | 5U19AI142785-04                       | GEISBERT, THOMAS WILLIAM                 | UNIVERSITY OF TEXAS MED BR GALVESTON                  | 2022        | 7,043,167              |
|                                                                                                                                               |                | 5U19AI142785-03                       |                                          |                                                       | 2021        | 7,571,405              |
|                                                                                                                                               |                | 5U19AI142785-02                       |                                          |                                                       | 2020        | 7,999,982              |
|                                                                                                                                               |                | 1U19AI142785-01                       |                                          |                                                       | 2019        | 7,867,218              |
| RNA Interference for the Treatment of Ebola and Marburg Hemorrhagic Fever                                                                     | NIAID          | 5R01AI089454-04                       | GEISBERT, THOMAS WILLIAM                 | UNIVERSITY OF TEXAS MED BR GALVESTON                  | 2013        | 649,731                |
|                                                                                                                                               |                | 5R01AI089454-03                       |                                          |                                                       | 2012        | 708,545                |
|                                                                                                                                               |                | 5R01AI089454-02                       |                                          |                                                       | 2011        | 747,210                |
|                                                                                                                                               |                | 1R01AI089454-01                       |                                          |                                                       | 2010        | 775,200                |
| Enhancing Immunological Memory Using Aptamer targeted siRNA Delivery to T Cells                                                               | NCI            | 3R01CA181598-03S1                     | GILBOA, ELI                              | UNIVERSITY OF MIAMI SCHOOL OF MEDICINE                | 2016        | 119,665                |
| Enhancing Immunological Memory Using Aptamertargeted siRNA Delivery to T Cells                                                                | NCI            | 3R01CA181598-05S1                     | GILBOA, ELI                              | UNIVERSITY OF MIAMI SCHOOL OF MEDICINE                | 2018        | 114,322                |
|                                                                                                                                               |                | 5R01CA181598-05                       |                                          |                                                       | 2018        | 361,194                |
|                                                                                                                                               |                | 3R01CA181598-04S1                     |                                          |                                                       | 2017        | 116,742                |
|                                                                                                                                               |                | 5R01CA181598-04                       |                                          |                                                       | 2017        | 368,838                |
|                                                                                                                                               |                | 5R01CA181598-03                       |                                          |                                                       | 2016        | 378,075                |
|                                                                                                                                               |                | 5R01CA181598-02                       |                                          |                                                       | 2015        | 383,171                |
|                                                                                                                                               |                | 1R01CA181598-01A1                     |                                          |                                                       | 2014        | 382,853                |
| Expressing New Tumor Antigens by Inhibition of Nonsense Mediated mRNA Decay                                                                   | NCI            | 5R01CA151857-05                       | GILBOA, ELI                              | UNIVERSITY OF MIAMI SCHOOL OF MEDICINE                | 2015        | 381,922                |
|                                                                                                                                               |                | 5R01CA151857-04                       |                                          |                                                       | 2014        | 370,157                |
|                                                                                                                                               |                | 5R01CA151857-03                       |                                          |                                                       | 2013        | 361,097                |
|                                                                                                                                               |                | 5R01CA151857-02                       |                                          |                                                       | 2012        | 393,669                |
|                                                                                                                                               |                | 1R01CA151857-01A1                     |                                          |                                                       | 2011        | 405,416                |
| Antigenicity and Immunogenicity of Stabilized prefusion F protein                                                                             | NIAID          | 1ZIAAI005129-06                       | GRAHAM, BARNEY                           | NATIONAL INSTITUTE OF ALLERGY AND INFECTIOUS DISEASES | 2021        | 1,555,860              |
|                                                                                                                                               |                | 1ZIAAI005129-05                       |                                          |                                                       | 2020        | 1,426,968              |
|                                                                                                                                               |                | 1ZIAAI005129-04                       |                                          |                                                       | 2019        | 2,125,700              |
|                                                                                                                                               |                | 1ZIAAI005129-03                       |                                          |                                                       | 2018        | 988,696                |
|                                                                                                                                               |                | 1ZIAAI005129-02                       |                                          |                                                       | 2017        | 1,289,255              |
|                                                                                                                                               |                | 1ZIAAI005129-01                       |                                          |                                                       | 2016        | 1,462,985              |
| Biodefense/Emerging Infection Vaccine Studies                                                                                                 | NIAID          | 1ZIAAI005047-11                       | GRAHAM, BARNEY                           | NATIONAL INSTITUTE OF ALLERGY AND INFECTIOUS DISEASES | 2013        | 1,030,852              |
|                                                                                                                                               |                | 1ZIAAI005047-10                       |                                          |                                                       | 2012        | 1,056,411              |
|                                                                                                                                               |                | 1ZIAAI005047-09                       |                                          |                                                       | 2011        | 5,429,733              |

|                                                                                                 |       |                   |                     |                                                             |      |           |
|-------------------------------------------------------------------------------------------------|-------|-------------------|---------------------|-------------------------------------------------------------|------|-----------|
|                                                                                                 |       | 1ZIAAI005047-08   |                     |                                                             | 2010 | 5,514,771 |
|                                                                                                 |       | 1ZIAAI005047-07   |                     |                                                             | 2009 | 3,157,177 |
| Coronavirus vaccine development                                                                 | NIAID | 1ZIAAI005125-08   | GRAHAM,<br>BARNEY   | NATIONAL INSTITUTE<br>OF ALLERGY AND<br>INFECTIOUS DISEASES | 2021 | 561,645   |
|                                                                                                 |       | 1ZIAAI005125-07   |                     |                                                             | 2020 | 1,519,760 |
|                                                                                                 |       | 1ZIAAI005125-06   |                     |                                                             | 2019 | 1,062,850 |
|                                                                                                 |       | 1ZIAAI005125-05   |                     |                                                             | 2018 | 494,348   |
|                                                                                                 |       | 1ZIAAI005125-04   |                     |                                                             | 2017 | 973,824   |
|                                                                                                 |       | 1ZIAAI005125-03   |                     |                                                             | 2016 | 1,149,177 |
|                                                                                                 |       | 1ZIAAI005125-02   |                     |                                                             | 2015 | 322,568   |
|                                                                                                 |       | 1ZIAAI005125-01   |                     |                                                             | 2014 | 454,814   |
| Influenza Vaccine Development                                                                   | NIAID | 1ZIAAI005003-19   | GRAHAM,<br>BARNEY   | NATIONAL INSTITUTE<br>OF ALLERGY AND<br>INFECTIOUS DISEASES | 2020 | 3,311,822 |
|                                                                                                 |       | 1ZIAAI005003-18   |                     |                                                             | 2019 | 4,251,399 |
|                                                                                                 |       | 1ZIAAI005003-17   |                     |                                                             | 2018 | 2,316,745 |
|                                                                                                 |       | 1ZIAAI005003-16   |                     |                                                             | 2017 | 2,754,244 |
|                                                                                                 |       | 1ZIAAI005003-15   |                     |                                                             | 2016 | 1,664,414 |
|                                                                                                 |       | 1ZIAAI005003-14   |                     |                                                             | 2015 | 1,686,849 |
| Rapid Development of Vaccines for Emerging Viruses                                              | NIAID | 1ZIAAI005128-06   | GRAHAM,<br>BARNEY   | NATIONAL INSTITUTE<br>OF ALLERGY AND<br>INFECTIOUS DISEASES | 2021 | 1,725,221 |
|                                                                                                 |       | 1ZIAAI005128-05   |                     |                                                             | 2020 | 1,426,968 |
|                                                                                                 |       | 1ZIAAI005128-04   |                     |                                                             | 2019 | 2,125,700 |
|                                                                                                 |       | 1ZIAAI005128-03   |                     |                                                             | 2018 | 2,268,871 |
| Vectors and Methods to Increase Immunogenicity during DNA Vaccination                           | NIAID | 1ZIAAI005061-15   | GRAHAM,<br>BARNEY   | NATIONAL INSTITUTE<br>OF ALLERGY AND<br>INFECTIOUS DISEASES | 2017 | 831,881   |
|                                                                                                 |       | 1ZIAAI005061-14   |                     |                                                             | 2016 | 612,630   |
|                                                                                                 |       | 1ZIAAI005061-13   |                     |                                                             | 2015 | 1,320,851 |
|                                                                                                 |       | 1ZIAAI005061-12   |                     |                                                             | 2014 | 1,333,379 |
|                                                                                                 |       | 1ZIAAI005061-11   |                     |                                                             | 2013 | 1,637,967 |
|                                                                                                 |       | 1ZIAAI005061-10   |                     |                                                             | 2012 | 1,761,176 |
|                                                                                                 |       | 1ZIAAI005061-09   |                     |                                                             | 2011 | 983,534   |
| Alternative Splicing and mRNA 3' End Formation in Normal Gene Regulation and Cancer Development | NIGMS | 5R01GM035490-32   | GREEN,<br>MICHAEL R | UNIV OF<br>MASSACHUSETTS MED<br>SCH WORCESTER               | 2021 | 351,122   |
|                                                                                                 |       | 5R01GM035490-31   |                     |                                                             | 2020 | 356,021   |
|                                                                                                 |       | 5R01GM035490-30   |                     |                                                             | 2019 | 364,840   |
|                                                                                                 |       | 2R01GM035490-29A1 |                     |                                                             | 2018 | 370,393   |
| Splicing of mRNA Precursors                                                                     | NIGMS | 5R01GM035490-28   | GREEN,<br>MICHAEL R | UNIV OF<br>MASSACHUSETTS MED<br>SCH WORCESTER               | 2013 | 380,315   |
|                                                                                                 |       | 5R01GM035490-27   |                     |                                                             | 2012 | 403,880   |
|                                                                                                 |       | 5R01GM035490-26   |                     |                                                             | 2011 | 415,932   |
|                                                                                                 |       | 2R01GM035490-25A1 |                     |                                                             | 2010 | 426,389   |
|                                                                                                 |       | 5R01GM035490-24   |                     |                                                             | 2008 | 369,421   |
|                                                                                                 |       | 5R01GM035490-23   |                     |                                                             | 2007 | 385,229   |
|                                                                                                 |       | 5R01GM035490-22   |                     |                                                             | 2006 | 405,018   |
|                                                                                                 |       | 2R01GM035490-21   |                     |                                                             | 2005 | 429,818   |
|                                                                                                 |       | 5R01GM035490-20   |                     |                                                             | 2004 | 318,598   |
|                                                                                                 |       | 5R01GM035490-19   |                     |                                                             | 2003 | 324,684   |
|                                                                                                 |       | 5R01GM035490-18   |                     |                                                             | 2002 | 333,289   |
|                                                                                                 |       | 2R01GM035490-17   |                     |                                                             | 2001 | 332,827   |
|                                                                                                 |       | 5R01GM035490-16   |                     |                                                             | 2000 | 260,238   |
|                                                                                                 |       | 5R01GM035490-15   |                     |                                                             | 1999 | 259,737   |
| 5R01GM035490-14                                                                                 | 1998  | 256,707           |                     |                                                             |      |           |

|                                                                                              |       |                      |                        |                                                       |                                                       |                 |                |
|----------------------------------------------------------------------------------------------|-------|----------------------|------------------------|-------------------------------------------------------|-------------------------------------------------------|-----------------|----------------|
|                                                                                              |       | 2R01GM035490-13      |                        |                                                       | 1997                                                  | 253,358         |                |
|                                                                                              |       | 5R01GM035490-12      |                        |                                                       | 1996                                                  | 428,693         |                |
|                                                                                              |       | 5R01GM035490-11      |                        |                                                       | 1995                                                  | 430,803         |                |
|                                                                                              |       | 5R01GM035490-10      |                        |                                                       | 1994                                                  | 426,141         |                |
|                                                                                              |       | 2R01GM035490-09      |                        |                                                       | 1993                                                  | 510,452         |                |
|                                                                                              |       | 5R01GM035490-08      |                        |                                                       | 1992                                                  | 467,060         |                |
|                                                                                              |       | 5R01GM035490-07      |                        |                                                       | 1991                                                  | 492,885         |                |
|                                                                                              |       | 7R01GM035490-06      |                        |                                                       | 1990                                                  | 502,338         |                |
|                                                                                              |       | 5R01GM035490-05      |                        | HARVARD UNIVERSITY                                    | 1989                                                  | 484,079         |                |
|                                                                                              |       | 2R01GM035490-04      |                        |                                                       | 1988                                                  | 575,796         |                |
|                                                                                              |       | 5R01GM035490-03      |                        |                                                       | 1987                                                  | 450,684         |                |
|                                                                                              |       | 5R01GM035490-02      |                        |                                                       | 1986                                                  | 383,970         |                |
|                                                                                              |       | 1R01GM035490-01      |                        |                                                       | 1985                                                  | 394,430         |                |
| Influenza Vaccine Development                                                                | NIAID | 1ZIAAI005003-20      | KANEKIYO, MASARU       |                                                       | NATIONAL INSTITUTE OF ALLERGY AND INFECTIOUS DISEASES | 2021            | 23,808,946     |
| Erythropoietin-encoding mRNA for treatment of anemia                                         | NHLBI | 5R42HL087688-03      | KARIKO, KATALIN        |                                                       | RNARX                                                 | 2010            | 518,956        |
|                                                                                              |       | 4R42HL087688-02      |                        | 2009                                                  |                                                       | 531,874         |                |
|                                                                                              |       | 1R42HL087688-01      |                        | 2007                                                  |                                                       | 135,283         |                |
| Structural Studies of the Corona Virus Life Cycle                                            | NIAID | 3R00AI123498-03S1    | KIRCHDOERFER, ROBERT N | UNIVERSITY OF WISCONSIN-MADISON                       | 2020                                                  | 140,741         |                |
| Structural Studies of the Coronavirus Life Cycle                                             | NIAID | 3R00AI123498-04S1    | KIRCHDOERFER, ROBERT N | UNIVERSITY OF WISCONSIN-MADISON                       | 2021                                                  | 99,142          |                |
|                                                                                              |       | 5R00AI123498-04      |                        |                                                       | 2021                                                  | 267,669         |                |
|                                                                                              |       | 4R00AI123498-03      |                        |                                                       | 2020                                                  | 271,405         |                |
|                                                                                              |       | 5K99AI123498-02      |                        | SCRIPPS RESEARCH INSTITUTE                            | 2018                                                  | 117,344         |                |
|                                                                                              |       | 1K99AI123498-01A1    |                        |                                                       | 2017                                                  | 119,828         |                |
| Computational Algorithms, Methods, and Tools for Structure-Based Vaccine and Antibody Design | NIAID | 1ZICAI005113-09      | KWONG, PETER D         | NATIONAL INSTITUTE OF ALLERGY AND INFECTIOUS DISEASES | 2018                                                  | 280,754         |                |
|                                                                                              |       | 1ZICAI005113-10      |                        |                                                       | 2019                                                  | 602,919         |                |
|                                                                                              |       | 1ZICAI005113-08      |                        |                                                       | 2017                                                  | 1,148,586       |                |
|                                                                                              |       | 1ZICAI005113-07      |                        |                                                       | 2016                                                  | 182,288         |                |
|                                                                                              |       | 1ZICAI005113-06      |                        |                                                       | 2015                                                  | 122,670         |                |
|                                                                                              |       | 1ZICAI005113-05      |                        |                                                       | 2014                                                  | 118,998         |                |
|                                                                                              |       | 1ZICAI005113-04      |                        |                                                       | 2013                                                  | 119,790         |                |
|                                                                                              |       | 1ZICAI005113-03      |                        |                                                       | 2012                                                  | 122,760         |                |
|                                                                                              |       | 1ZICAI005113-02      |                        |                                                       | 2011                                                  | 126,423         |                |
|                                                                                              |       | 1ZICAI005113-01      |                        |                                                       | 2010                                                  | 129,700         |                |
|                                                                                              |       | Design Of Immunogens |                        |                                                       | NIAID                                                 | 1ZIAAI005024-20 | KWONG, PETER D |
| 1ZIAAI005024-19                                                                              | 2020  |                      | 1,998,663              |                                                       |                                                       |                 |                |
| 1ZIAAI005024-18                                                                              | 2019  |                      | 3,818,774              |                                                       |                                                       |                 |                |
| 1ZIAAI005024-17                                                                              | 2018  |                      | 1,296,982              |                                                       |                                                       |                 |                |
| 1ZIAAI005024-16                                                                              | 2017  |                      | 2,973,519              |                                                       |                                                       |                 |                |
| 1ZIAAI005024-15                                                                              | 2016  |                      | 717,604                |                                                       |                                                       |                 |                |
| 1ZIAAI005024-14                                                                              | 2015  |                      | 967,877                |                                                       |                                                       |                 |                |
| 1ZIAAI005024-13                                                                              | 2014  |                      | 967,073                |                                                       |                                                       |                 |                |
| 1ZIAAI005024-12                                                                              | 2013  |                      | 973,509                |                                                       |                                                       |                 |                |

|                                                                                                                 |       |                   |                       |                                                       |         |           |
|-----------------------------------------------------------------------------------------------------------------|-------|-------------------|-----------------------|-------------------------------------------------------|---------|-----------|
|                                                                                                                 |       | 1ZIAAI005024-11   |                       |                                                       | 2012    | 997,646   |
|                                                                                                                 |       | 1ZIAAI005024-10   |                       |                                                       | 2011    | 1,023,998 |
|                                                                                                                 |       | 1ZIAAI005024-09   |                       |                                                       | 2010    | 1,046,575 |
|                                                                                                                 |       | 1ZIAAI005024-08   |                       |                                                       | 2009    | 225,913   |
| Immunogen Design for SARS-CoV-2                                                                                 | NIAID | 1ZIAAI005149-02   | KWONG, PETER D        | NATIONAL INSTITUTE OF ALLERGY AND INFECTIOUS DISEASES | 2021    | 652,166   |
|                                                                                                                 |       | 1ZIAAI005149-01   |                       |                                                       | 2020    | 277,663   |
| Dityrosine Locked Prefusion F Protein: A Path To A Protective RSV Vaccine                                       | NIAID | 1R43AI112124-01A1 | MARIANI, ROBERTO      | AVATAR MEDICAL, LLC                                   | 2014    | 359,220   |
| Pre-clinical Vaccine and Antibody Development for Coronavirus Disease 2019 (COVID-19)                           | NIAID | 1ZIAAI005152-02   | MASCOLA, JOHN         | NATIONAL INSTITUTE OF ALLERGY AND INFECTIOUS DISEASES | 2021    | 422,545   |
|                                                                                                                 |       | 1ZIAAI005152-01   |                       |                                                       | 2020    | 276,290   |
| Pre-clinical Vaccine Development for Emerging and Re-emerging Infectious Diseases                               | NIAID | 1ZICAI005134-03   | MASCOLA, JOHN         | NATIONAL INSTITUTE OF ALLERGY AND INFECTIOUS DISEASES | 2021    | 4,229,211 |
|                                                                                                                 |       | 1ZICAI005134-02   |                       | NATIONAL INSTITUTE OF ALLERGY AND INFECTIOUS DISEASES | 2020    | 4,493,907 |
|                                                                                                                 |       | 1ZICAI005134-01   |                       | NATIONAL INSTITUTE OF ALLERGY AND INFECTIOUS DISEASES | 2019    | 4,065,354 |
| Structure, Function and Antigenicity of Coronavirus Spike Proteins                                              | NIAID | 5R01AI127521-05   | MCLELLAN, JASON SCOTT | UNIVERSITY OF TEXAS, AUSTIN                           | 2021    | 659,009   |
|                                                                                                                 |       | 5R01AI127521-04   |                       |                                                       | 2020    | 668,205   |
|                                                                                                                 |       | 5R01AI127521-03   |                       |                                                       | 2019    | 684,757   |
|                                                                                                                 |       | 7R01AI127521-02   |                       |                                                       | 2018    | 711,196   |
|                                                                                                                 |       | 1R01AI127521-01A1 | DARTMOUTH COLLEGE     | 2017                                                  | 737,264 |           |
| Development of Universal Influenza Virus Vaccines Using Nucleoside-Modified Messenger RNA                       | NIAID | 5R01AI146101-03   | PARDI, NORBERT        | UNIVERSITY OF PENNSYLVANIA                            | 2021    | 656,203   |
|                                                                                                                 |       | 5R01AI146101-02   |                       |                                                       | 2020    | 664,635   |
|                                                                                                                 |       | 1R01AI146101-01   |                       |                                                       | 2019    | 715,794   |
| Lipid nanoparticles as novel adjuvants inducing effective T follicular helper cell and humoral immune responses | NIAID | 5R01AI153064-02   |                       |                                                       | 2021    | 680,666   |
|                                                                                                                 |       | 1R01AI153064-01   |                       |                                                       | 2020    | 678,092   |
| Nucleoside modified mRNA based HIV vaccine                                                                      | NIAID | 5R01AI124429-04   | WEISSMAN, DREW        | UNIVERSITY OF PENNSYLVANIA                            | 2019    | 934,047   |
|                                                                                                                 |       | 5R01AI124429-03   |                       |                                                       | 2018    | 951,673   |
|                                                                                                                 |       | 5R01AI124429-02   |                       |                                                       | 2017    | 975,199   |
|                                                                                                                 |       | 1R01AI124429-01   |                       |                                                       | 2016    | 1,020,789 |
| Oral Delivery of RNA Encoded Antigen                                                                            | NIDCR | 5R21DE019059-02   | WEISSMAN, DREW        | UNIVERSITY OF PENNSYLVANIA                            | 2009    | 243,881   |
|                                                                                                                 |       | 1R21DE019059-01   |                       |                                                       | 2008    | 292,658   |
| RNA delivery for dendritic cell HIV antigen presentation                                                        | NIAID | 5R01AI050484-09   | WEISSMAN, DREW        | UNIVERSITY OF PENNSYLVANIA                            | 2011    | 492,812   |
|                                                                                                                 |       | 5R01AI050484-08   |                       |                                                       | 2010    | 505,588   |
|                                                                                                                 |       | 5R01AI050484-07   |                       |                                                       | 2009    | 524,475   |
|                                                                                                                 |       | 2R01AI050484-06A2 |                       |                                                       | 2008    | 524,475   |
|                                                                                                                 |       | 3R01AI050484-05S1 |                       |                                                       | 2007    | 104,119   |
|                                                                                                                 |       | 5R01AI050484-05   |                       |                                                       | 2006    | 548,678   |
|                                                                                                                 |       | 5R01AI050484-04   |                       |                                                       | 2005    | 584,073   |
|                                                                                                                 |       | 5R01AI050484-03   |                       |                                                       | 2004    | 601,508   |
|                                                                                                                 |       | 5R01AI050484-02   |                       |                                                       | 2003    | 612,999   |
|                                                                                                                 |       | 1R01AI050484-01A2 |                       |                                                       | 2002    | 629,245   |
| Dityrosine Locked Prefusion F Protein: A Path To A Protective RSV Vaccine                                       | NIAID | 5R43AI112124-02   | YONDOLA, MARK         | AVATAR MEDICAL, LLC                                   | 2015    | 357,072   |

eTable 4. Biomedical Advanced Research and Development Authority and Department of Defense Grants Directly Related to mRNA COVID-19 Development.

| <b>Date</b> | <b>Funding Agency</b> | <b>Grant Recipient</b> | <b>Original Cost (USD)</b> | <b>Cost (2022 USD)*</b> | <b>Funding Category</b>              | <b>Description</b>                                                                                      |
|-------------|-----------------------|------------------------|----------------------------|-------------------------|--------------------------------------|---------------------------------------------------------------------------------------------------------|
| 11/15/11    | DOD                   | CureVac                | 33,100,000                 | 42,268,700              | Vaccine development, clinical trials | Given to support the pre-clinical development of mRNA vaccine technology, especially against rabies.    |
| 9/7/16      | BARDA                 | Moderna                | 125,000,000                | 148,375,000             | Vaccine development                  | Given to support the development of mRNA vaccines against infectious diseases broadly, then Chikungunya |
| 10/2/13     | DOD                   | Moderna                | 24,600,000                 | 29,766,000              | Vaccine development, clinical trials | Given to support the pre-clinical development of mRNA vaccines against Zika.                            |
| 4/16/20     | BARDA                 | Moderna                | 430,298,520                | 469,025,386             | Clinical trials                      | Given to support late-stage development of mRNA vaccines against COVID-19                               |
| 5/24/20     | BARDA                 | Moderna                | 53,000,000                 | 57,770,000              | Manufacturing                        | Given to boost manufacturing capacity of mRNA vaccines against COVID-19                                 |
| 7/21/20     | BARDA                 | Pfizer                 | 1,950,000,000              | 2,125,500,000           | Vaccine supply                       | Used to purchase 100,000,000 vaccine doses (\$21.26/dose)                                               |
| 7/25/20     | BARDA                 | Moderna                | 471,596,459                | 514,040,140             | Clinical trials                      | Given to fund late-stage clinical trials of mRNA vaccines against COVID-19                              |
| 8/11/20     | BARDA                 | Moderna                | 1,525,000,000              | 1,662,250,000           | Vaccine supply                       | Used to purchase 100,000,000 vaccine doses (\$16.62/dose)                                               |
| 9/1/20      | DOD                   | Pfizer                 | 48,683,161                 | 53,064,645              | Vaccine supply                       | For procurement and delivery of pharmaceutical products                                                 |
| 12/11/20    | BARDA                 | Moderna                | 1,666,598,000              | 1,816,591,820           | Vaccine supply                       | Used to purchase 100,000,000 vaccine doses (\$18.17/dose)                                               |
| 12/22/20    | BARDA                 | Pfizer                 | 2,011,282,500              | 2,192,297,925           | Vaccine supply                       | Used to purchase 100,000,000 vaccine doses (\$21.92/dose)                                               |

|          |       |         |               |               |                 |                                                                                                                      |
|----------|-------|---------|---------------|---------------|-----------------|----------------------------------------------------------------------------------------------------------------------|
| 2/11/21  | BARDA | Moderna | 1,650,000,000 | 1,773,750,000 | Vaccine supply  | Used to purchase 100,000,000 vaccine doses (\$17.74/dose)                                                            |
| 2/11/21  | BARDA | Pfizer  | 2,011,282,500 | 2,162,128,687 | Vaccine supply  | Used to purchase 100,000,000 vaccine doses (\$21.62/dose)                                                            |
| 3/12/21  | BARDA | Moderna | 62,705,357    | 67,408,259    | Clinical trials | Used to fund clinical trials in adolescents, with crossover doses                                                    |
| 4/18/21  | BARDA | Moderna | 236,364,615   | 254,091,961   | Clinical trials | Moderna was given more money to cover the costs of various clinical trials, other costs associated with the studies. |
| 6/15/21  | BARDA | Moderna | 3,303,993,662 | 3,551,793,187 | Vaccine supply  | Used to purchase 200,000,000 vaccine doses (\$17.76/dose)                                                            |
| 6/15/21  | BARDA | Moderna | 144,140,941   | 154,951,512   | Clinical trials | Used to fund clinical trials of the vaccine in children                                                              |
| 7/21/21  | BARDA | Pfizer  | 4,869,750,000 | 5,234,981,250 | Vaccine supply  | Used to purchase 200,000,000 vaccine doses (\$26.17/dose)                                                            |
| 7/30/21  | DOD   | Pfizer  | 3,500,000,001 | 3,762,500,001 | Vaccine supply  | Used to purchase 500,000,000 vaccine doses for international donation (\$7.53/dose)                                  |
| 10/22/21 | BARDA | Pfizer  | 1,230,000,000 | 1,322,250,000 | Vaccine supply  | Used to purchase 50,000,000 vaccine doses (\$26.45/dose)                                                             |
| 11/19/21 | DOD   | Pfizer  | 1,400,000,001 | 1,505,000,001 | Vaccine supply  | Used to purchase 200,000,000 vaccine doses for international donation (\$7.53/dose)                                  |
| 1/19/22  | DOD   | Pfizer  | 2,047,500,000 | 2,047,500,000 | Vaccine supply  | Used to purchase 300,000,000 vaccine doses for international donation (\$6.83/dose)                                  |
| 3/22/22  | BARDA | Moderna | 308,000,000   | 308,000,000   | Clinical trials | Given to fund clinical trials of mRNA vaccines against COVID-19 in children                                          |

\*Inflation-adjusted to 2022 USD using the CPI for all Urban consumers (CPI-U).
